# Supplementary material for: Presence of leptin and its receptor in the ram reproductive system andin vitroeffect of leptin on sperm quality
Source: PeerJ journal article supplement (doi:10.7717/peerj.13982), 2022-09-26
Supplement: supplementary.zip [file supplementary.zip]

## Sheet: OB
	OB	β-actin	△Ct	blank△Ct mean	-△△Ct	2-△△Ct	2-△△Ctmean	STDEV
epididymal sperm	23.42	16.27	7.15	7.23667	0.0866667	1.06191	1.00217	0.0796647
	23.73	16.36	7.37		-0.133333	0.911722
	23.55	16.36	7.19		0.0466667	1.03288
ejaculated sperm	25.25	16.23	9.02		-1.78333	0.290511	0.290679	0.0120864
	25.23	16.15	9.08		-1.84333	0.278677
	25.21	16.25	8.96		-1.72333	0.302848
	Mean	STDEV
epididymal sperm	1.00217	0.0796647
ejaculated sperm	0.290679	0.0120864

## Sheet: OBR
	OBR	β-actin	△Ct	blank△Ct mean	-△△Ct	2-△△Ct	2-△△Ctmean	STDEV
epididymal sperm	20.58	15.45	5.13	5.02667	-0.103333	0.93088	1.00127	0.0610671
	20.41	15.43	4.98		0.0466667	1.03288
	20.68	15.71	4.97		0.0566667	1.04006
ejaculated sperm	23.45	15.76	7.69		-2.66333	0.157854	0.162092	0.00928483
	23.43	15.87	7.56		-2.53333	0.172739
	23.41	15.7	7.71		-2.68333	0.155681
	Mean	STDEV
epididymal sperm	1.00127	0.0610671
ejaculated sperm	0.162092	0.00928483
